# Supplementary material
Source: PubMed Central journal article supplement (PMC3069188)
Supplement: 1007645108_pnas.201007645SI.pdf [file 1007645108_pnas.201007645SI.pdf]

# Supporting Information

Daniel et al. 10.1073/pnas.1007645108

## SI Materials and Methods

**RNAi Methods.** For transient Mps1 transfections, fluorescein-labeled oligonucleotides specific for Mps1 (GGU UGA GUU UGU UGC UCA A) and a scrambled sequence (GGU UUG AUU GUU CGG UCA A) (Invitrogen) were transfected into  $\approx 70\%$  confluent cultures by using lipofectamine (Invitrogen). Cells were incubated at  $37^\circ\text{C}$   $5\%$   $\text{CO}_2$  for 48–72 h. For stable transfections, shRNA oligos (5'-CACCGGTCGTTACAGTCAAGCAATTCGAAAATTGCTTGACTGTAACGACC-3'; 3'-CCAGCAATGTCAGTTTCGTTAAGCTTTTAACGAACTGACATTGCTGGAAAA-5') were cloned into pENTR/H1/TO (Invitrogen) vector for tetracycline induction. These oligonucleotides were then transfected into cells with lipofectamine (Invitrogen) or by electroporation (Amaxa Biosystems). Stable transfectants were selected by using Blasticidin and Zeocin (Invitrogen). Cells were sustained in media supplemented with Tet-approved FBS (Invitrogen). Mps1 shRNA was then induced by adding 100  $\mu\text{g}/\text{mL}$  tetracycline to media.

**Time-Lapse Microscopy.** For visualization of mitoses, cells were stably transfected with pBOS-H2B-GFP construct (BD Pharmingen) and selected for Blasticidin resistance. Cells were then selected for high fluorescence by using FACS and used in subsequent experiments. Cultures at 70% confluency were either mock transfected or transiently transfected with Mps1 siRNA or a scrambled sequence, recultured for 24 h, and photographed with either  $40\times$  or  $20\times$  magnification at 5 min intervals over 24 h by using a Nikon 2000E Fluorescence microscope. Images were analyzed by using NIS Elements AR (Nikon).

**Analysis of Metaphase Spreads for Chromosome Numbers.** Cells in log growth were incubated in the presence of 1  $\mu\text{g}/\text{mL}$  colcemid at  $37^\circ\text{C}$  for 1–3 h, washed with PBS, harvested by trypsinization, and pelleted by centrifugation. The pellet was then incubated with 5 mL of 0.5% KCl for 5 min, centrifuged, and fixed by drop-wise addition of methanol:glacial acetic acid (3:1). After another centrifugation, this step was repeated twice and the final pellet was suspended in 200  $\mu\text{L}$  of fixative. Metaphase spreads were then prepared by releasing drops from a height of  $\approx 10$  cm onto slides, and after air drying, slides were stained with 0.5% Enzar-t (Armour Pharmaceuticals). Chromosomes were counted in satisfactory spreads in a blinded manner.

**Fluorescent in Situ Hybridization (FISH).** Cells stably transfected with a pENTR-<sup>1</sup>H-TO Mps1 shRNA construct (or vector) were plated on chamber slides at low density in selective media and treated with 0 or 100  $\mu\text{g}/\text{mL}$  tetracycline. Cells were grown for an addi-

tional 5–7 d and then fixed and incubated with chromagen-labeled FISH probes to Centromere 17 and Centromere 8 (green), and Centromere 11 and Centromere 7 (red), by using manufacturer's protocols (Abbott Molecular). Cells were visualized at  $40\times$  magnification with an Olympus DX60 fluorescence microscope and assessed by using Image-Pro Plus (Media Cybernetics).

**Immunohistochemistry.** Explanted tumors of killed mice were fixed in 10% buffered formalin for at least 48 h, embedded in paraffin, and sectioned at 5 microns for immunohistochemical staining. The  $K_i-67$  (MIB-1; Dako) and active caspase 3 (Abcam) primary antibodies were used at 1:500 and 1:100 dilutions, respectively, for 4 h according to manufacturers' instructions. After washings, a secondary antibody conjugated with peroxidase was applied to detect and visualize the specific antigen–antibody complexes by using LASB System-HRP assay kit (Dako). Scoring was performed by counting 100 cells in a representative field for each of eight tissue samples in each of the treatment groups. Data are reported as means  $\pm$  SDs for those counts.

**Annexin V Staining.** Annexin V assays (PharMingen) were conducted according to the manufacturer's protocol. Live cells were harvested by using 0.25% trypsin-EDTA, washed with binding buffer, and incubated in 100  $\mu\text{L}$  of Annexin V binding buffer and 5  $\mu\text{L}$  of FITC-conjugated Annexin V in the dark at room temperature for 15 min. Dead cell discrimination was accomplished by using a propidium iodide counterstain, and at least 10,000 events were analyzed. Four hundred microliters of binding buffer was then added, and the cells were analyzed on a FACSCalibur flow cytometer by using CellQuest software (BD Biosciences).

**Human Breast Cancer Xenografts.** To establish xenografts,  $2 \times 10^6$  cells were implanted directly into the mammary fat pad of irradiated (500 cGy), anesthetized (xylazine/ketamine) female, athymic nude mice (Harlan). At 1 d or 12 d after inoculation, randomly selected mice were switched to feed containing doxycycline hyclate (Harlan), a diet designed to deliver a daily dose of 2–3 mg of doxycycline based on consumption of 4–5 grams of food daily per mouse. Tumors were measured weekly by using calipers in two dimensions, and tumor volume was estimated as the product of the longitudinal measurement, the transverse measurement, and the average of these two measurements. Mice were killed 28 d after inoculation, and tumors were removed for histological examination. Statistical significance between groups was determined by using a two-tailed, nonparametric Student's *t* test.





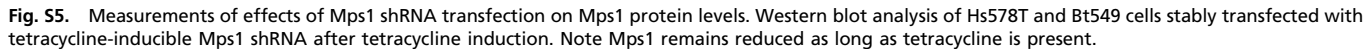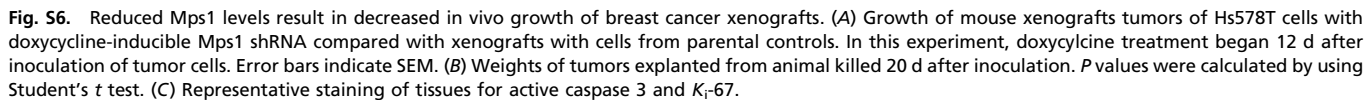

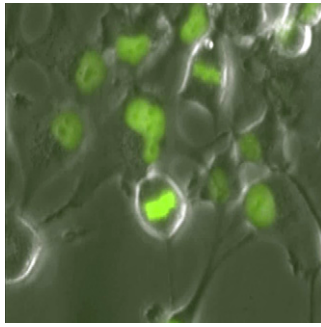

**Movie S1.** Control Hs578T cells progressing through mitosis. Two control cells in metaphase complete mitosis in  $\approx 25$  min. Selected individual frames are shown in Fig. 4A.

[Movie S1](#)

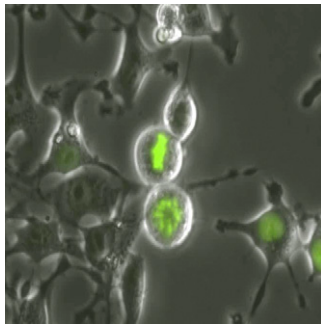

**Movie S2.** Hs578T cells with reduced Mps1 progressing through mitosis. Two Mps1 siRNA-treated cells, one in prometaphase and one in metaphase, unsuccessfully attempt cell division. The bottom cell remains in prometaphase before finally undergoing apoptosis after  $\approx 90$  min. Note the top metaphase cell makes several attempts to divide before retrogressing to a prometaphase-like state with condensed but unaligned chromosomes. The cell undergoes apoptosis after 170 min.

[Movie S2](#)

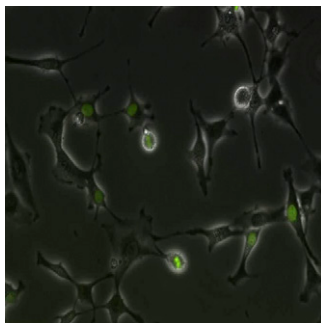

**Movie S3.** Hs578T cells with reduced Mps1 progressing through mitosis. Mps1 siRNA-treated Hs578T cells divide but fail to undergo cytokinesis and eventually become multinucleated.

[Movie S3](#)
